# Supplementary material
Source: publisher figshare collection journal article supplement (https://acs.figshare.com/ndownloader/files/19156694)
Supplement: Supplementary file 1 [file 19156694]

## Supporting Information

### **Development of Microspheres Based on Thiol-Modified Sodium Alginate for Intestinal-Targeted Drug Delivery**

Xinyan Mao,<sup>†</sup> Xinying Li,<sup>‡</sup> Wenjie Zhang,<sup>#</sup> Lun Yuan,<sup>†</sup> Lei Deng,<sup>†</sup> Liming Ge,<sup>†</sup> Changdao Mu,<sup>†</sup>  
and Defu Li<sup>\*,†</sup>

<sup>†</sup>Department of Pharmaceutics and Bioengineering, School of Chemical Engineering, Sichuan University, Chengdu 610065, P. R. China

<sup>‡</sup>College of Chemistry and Environment Protection Engineering, Southwest Minzu University, Chengdu 610041, P. R. China

<sup>#</sup> Department of Nuclear Medicine, West China Hospital, Sichuan University, Chengdu 610041, P. R. China

\*Corresponding Author: Defu Li, E-mail: lidefu@scu.edu.cn.

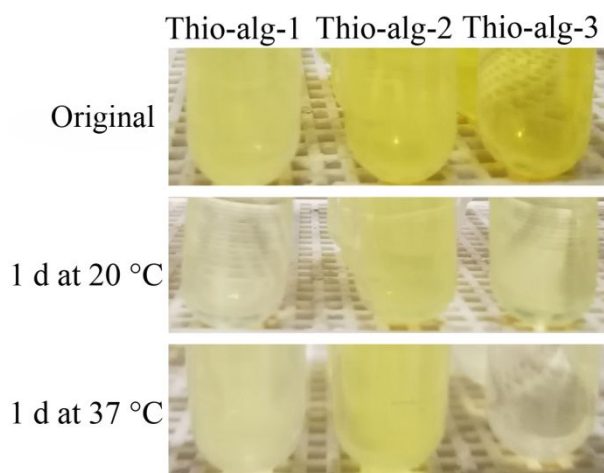

**Fig. S1.** Digital photographs of color changes of thiol-modification conjugate at different temperatures by Ellman's reagent method.

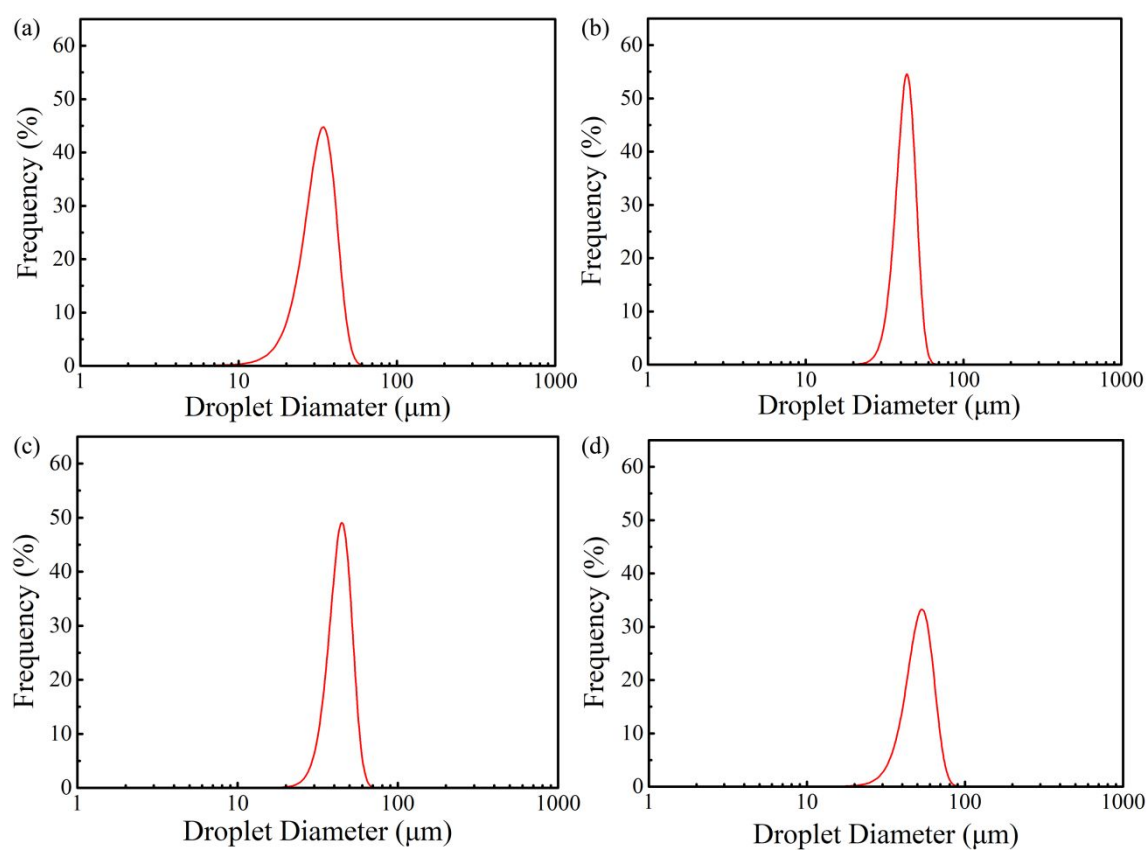

**Fig. S2.** Diameter distribution curves of (a) Ca-Alg, (b) BSA-Ca-Alg, (c) Ca-ThAlg and (d) BSA-Ca-ThAlg microspheres dispersed in deionized water.
